## OBSERVATIONS

## Is Metformin Safe in Patients With Mild Renal Insufficiency?

**A**mong the first million patients who received metformin in the U.S., 47 patients developed metformin-associated lactic acidosis (MALA), with 43 having predisposing factors for lactic acidosis (including moderate to severe renal failure and congestive heart failure) (1). Although there was initial concern, studies have suggested that MALA is secondary to underlying conditions and represents a coincidental finding (2,3). While the current consensus is that the risk of lactic acidosis is negligible when metformin is used as labeled (4), we present a patient who developed MALA in the absence of currently recognized contraindications to metformin.

A 55-year-old man with hypertension, type 2 diabetes, and mild renal insufficiency (measured creatinine clearance 91 ml/min) presented with sudden onset of fatigue, vomiting, and altered mental status after performing strenuous yard work without sufficient hydration. His medications included nifedipine, captopril, hydrochlorothiazide, glyburide, and metformin.

The patient rapidly developed respiratory distress and hypotension necessitating intubation and vasoactive agents. Laboratory studies revealed a serum creatinine level of 9.4 mg/dl, pH 6.98,  $\text{CO}_2$  <6 mmol/l, and lactic acid 27 mmol/l. Evaluation using a computed tomography scan and magnetic resonance angiography of the abdomen/pelvis, various cultures and cardiac echocardiogram could not reveal an etiology for lactic acidosis. Serum metformin level (ARUP Laboratories, Salt Lake City, UT) was 8 mg/l (therapeutic range 1–2). Continuous venovenous hemofiltration was initiated immediately. Conservative management was followed by rapid amelioration of his general status. He was extubated within 24 h, continuous venovenous hemofiltration was stopped after 36 h, and he was discharged 6 days after presentation without deficits.

This case is unique in that MALA developed in the absence of currently recognized risk factors or predisposing

conditions. Although this patient had mild impairment of kidney function, contraindication criteria for the use of metformin were not met (5). The patient was taking 2 g metformin per day, which is within the recommended therapeutic range.

In our opinion, a threshold serum creatinine level above normal range should not be considered safe for metformin use because renal function can rapidly deteriorate in patients with even mild underlying kidney disease, resulting in accumulation of metformin and development of MALA. We suggest that consideration be given to avoiding metformin in patients with any degree of renal dysfunction.

AMIR KAZORY, MD<sup>1</sup>

KATHERINE WALSH, MD<sup>2</sup>

ELOISE HARMAN, MD<sup>3</sup>

ZVI TALOR, MD<sup>1</sup>

From the <sup>1</sup>Division of Nephrology, University of Florida College of Medicine at UF Shands Hospital, Gainesville, Florida; the <sup>2</sup>Department of Internal Medicine, University of Florida College of Medicine at UF Shands Hospital, Gainesville, Florida; and the <sup>3</sup>Division of Pulmonary Medicine, University of Florida College of Medicine at UF Shands Hospital, Gainesville, Florida.

Address correspondence to Katherine Walsh, MD, Department of Internal Medicine, Shands Hospital, University of Florida, 1600 SW Archer Rd., Gainesville, FL 32610. E-mail: walshkj@medicine.ufl.edu.

DOI: 10.2337/dc06-2155

© 2007 by the American Diabetes Association.

## References

- Misbin RI, Green L, Stadel BV, Gueiriquian JL, Gubbi A, Fleming GA: Lactic acidosis in patients with diabetes treated with metformin. *N Engl J Med* 338:265–266, 1998
- Misbin RI: The phantom of lactic acidosis due to metformin in patients with diabetes. *Diabetes Care* 27:1791–1793, 2004
- Salpeter S, Greyber G, Pasternak G, Salpeter E: Risk of fatal and nonfatal lactic acidosis with metformin use in type 2 diabetes mellitus. *Cochrane Database Sys Rev* no. CD002967, 2006
- Luft FC: Lactic acidosis update for critical care clinicians. *J Am Soc Nephrol* 12:S15–S19, 2001
- Holstein A, Stumvoll M: Contraindications can damage your health: is metformin a case in point? *Diabetologia* 48:2454–2459, 2005

## Malignant Melanoma Misdiagnosed as a Diabetic Foot Ulcer

**A** male patient aged 48 years with type 2 diabetes presented with a painless nonhealing ulcer of 18 months duration under his right first metatarsal head. The ulcer was not a typical-appearing neuropathic foot ulcer and had mushrooming granulation tissue and areas of intact epidermis in a lenticular fashion over the wound bed (Fig. 1). The patient also complained of a “knot” in his right inguinal area. An incisional biopsy was taken from the foot lesion, which revealed a poorly differentiated melanoma covered by an intact epidermis and granulation tissue. The incisional biopsy was 0.8-cm thick, and melanoma extended to the deep margin. At presentation, the size and poor differentiation of the tumor made it impossible to assess the subtype of the original melanoma. The S-100 and HMB-45 stains (positive in melanoma cases) were strongly positive. A computed tomography of the chest, abdomen, and inguinal areas revealed metastasis to the inguinal lymph nodes and liver. The patient died 6 months later.

Although rare, melanomas can present as neuropathic foot ulcers in individuals with diabetes (1,2). Melanomas are located on the plantar surface in ~7% of cases (3) with the exception of Japanese patients, in whom the plantar surface is

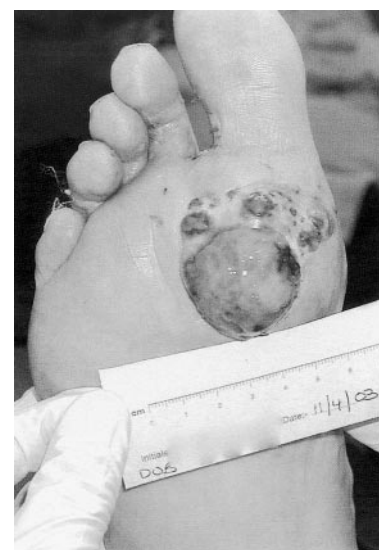

**Figure 1**—Malignant melanoma tumor that was misdiagnosed as a neuropathic foot ulcer.

the most common location (4). Acral lentiginous melanoma is the most common melanoma type that presents on the plantar aspect of the foot (3). This type of melanoma is commonly amelanotic, frequently ulcerates (5), and does not exhibit the classic signs of malignant melanoma associated with the mnemonic aid "ABCD" (asymmetry, border, color, diameter). In a review (6) of 53 lower extremity melanomas, 11 of 18 (61%) misdiagnosed cases were on the plantar foot. All misdiagnosed lesions were histopathologically acral lentiginous melanomas. Initial misdiagnoses included nonhealing ulcer, wart, tinea pedis, and onychomycosis. Another retrospective review (7) of palmoplantar melanoma found that misdiagnosis led to a median delay of treatment for 12 months and was associated with increased tumor thickness (5.0 vs. 1.5 mm) and a lower 5-year survival rate (15.4 vs. 68.9%).

We are not supposing that plantar melanoma occurs more frequently in individuals with diabetes. However, we believe there is a greater chance of misdiagnosis given this population's predilection toward plantar ulceration. An individual with peripheral sensory neuropathy is more likely to unknowingly ambulate on a plantar foot lesion, and this increased pressure and trauma can cause a lesion to initially resemble a diabetic foot ulcer. This case and short review emphasizes the importance of performing biopsies on chronic and atypical wounds early in the treatment algorithm of diabetic foot ulcers.

LEE C. ROGERS, DPM<sup>1</sup>

DAVID G. ARMSTRONG, DPM, PHD<sup>1</sup>

ANDREW J.M. BOULTON, MD, FRCPATH<sup>2</sup>

ANTHONY J. FREEMONT, MD, FRCP<sup>3</sup>

RAYAZ A. MALIK, MB, CHB, MRCP, PHD<sup>2</sup>

From the <sup>1</sup>Center for Lower Extremity Ambulatory Research (CLEAR), Rosalind Franklin University of Medicine and Science, Chicago, Illinois; the <sup>2</sup>Divisions of Cardiovascular and Endocrine Science, University of Manchester, Manchester, U.K.; and the <sup>3</sup>Department of Regenerative Medicine, University of Manchester, Manchester, U.K.

Address correspondence to Lee C. Rogers, DPM, Scholl's Center for Lower Extremity Ambulatory Research (CLEAR), Rosalind Franklin University of Medicine, 3333 Green Bay Rd., North Chicago, IL 60064. E-mail: lee.rogers@rosalindfranklin.edu.

DOI: 10.2337/dc06-2251

© 2007 by the American Diabetes Association.

## References

1. Gregson CL, Allain TJ: Amelanotic malignant melanoma disguised as a diabetic

- foot ulcer. *Diabet Med* 21:924–927, 2004
2. Kong MF, Jogia R, Jackson S, Quinn M, McNally P, Davies M: Malignant melanoma presenting as a foot ulcer. *Lancet* 366:1750, 2005
3. Franke W, Neumann NJ, Ruzicka T, Schulte KW: Plantar malignant melanoma: a challenge for early recognition. *Melanoma Res* 10:571–576, 2000
4. Kato T, Tabata N, Suetake T, Tagami H: Non-pigmented nodular plantar melanoma in 12 Japanese patients. *Br J Dermatol* 136:207–211, 1997
5. Dwyer PK, Mackie RM, Watt DC, Aitchison TC: Plantar malignant melanoma in a white Caucasian population. *Br J Dermatol* 128:115–120, 1993
6. Soon SL, Solomon AR Jr, Papadopoulos D, Murray DR, McAlpine B, Washington CV: Acral lentiginous melanoma mimicking benign disease: the Emory experience. *J Am Acad Dermatol* 48:183–188, 2003
7. Metzger S, Ellwanger U, Stroebel W, Schiebel U, Rassner G, Fierlbeck G: Extent and consequences of physician delay in the diagnosis of acral melanoma. *Melanoma Res* 8:181–186, 1998

## COMMENTS AND RESPONSES

### An Open, Randomized, Parallel-Group Study to Compare the Efficacy and Safety Profile of Inhaled Human Insulin (Exubera) With Glibenclamide as Adjunctive Therapy in Patients With Type 2 Diabetes Poorly Controlled on Metformin

Response to Barnett et al.

In response to the interesting article by Barnett et al. (1), we would like to offer the following comments. Diabetes control has been shown to improve with diet and exercise regimens (2,3). The degree of study participants' compliance with diet and exercise regimens may have con-

founded the change in A1C reported in the study (1). Also, the independent effect of BMI on both diabetes control and response to therapy has been studied extensively (4). The effect of modification of baseline BMI on diabetes control among various strata of BMI in both study groups needs clarification.

The open-blinded design of the study (1), especially since it involves diabetes education and self monitoring, can significantly impact internal validity due to both performance bias of the subject with respect to compliance with lifestyle modifications as well as detection bias of the health care providers in ascertaining adverse outcomes (5). In addition, the non-inferiority design offers no protection against a predetermined idea of equivalence by the investigator, who could allocate similar scores to responses and events of all study subjects (6).

BALAVENKATESH KANNA, MD, MPH<sup>1,2</sup>

HEIDI ABREU-PACHECO, MD<sup>1</sup>

From the <sup>1</sup>Department of Internal Medicine, Lincoln Medical & Mental Health Center, Bronx, New York; and the <sup>2</sup>Weill Medical College of Cornell University, New York, New York.

Address correspondence to Balavenkatesh Kanna, MD, MPH, Department of Medicine, Suite 8-22, 8th Floor, 234 E. 149th St., Bronx, NY 10451. E-mail: balavenkatesh.kanna@nychhc.org.

DOI: 10.2337/dc06-2031

© 2007 by the American Diabetes Association.

## References

1. Barnett AH, Dreyer M, Lange P, Serdarevic-Pehar M, the Exubera Phase III Study Group: An open, randomized, parallel-group study to compare the efficacy and safety profile of inhaled human insulin (Exubera) with glibenclamide as adjunctive therapy in patients with type 2 diabetes poorly controlled on metformin. *Diabetes Care* 29:1818–1825, 2006
2. Sigal RJ, Kenny GP, Wasserman DH, Castaneda-Sceppa C, White RD: Physical activity/exercise and type 2 diabetes: a consensus statement from the American Diabetes Association. *Diabetes Care* 29:1433–1438, 2006
3. American Diabetes Association: Nutrition recommendations and interventions for diabetes: a position statement of the American Diabetes Association (Position Statement). *Diabetes Care* 29:2140–2157, 2006
4. Klein S, Sheard NF, Pi-Sunyer X, Daly A, Wylie-Rosett J, Kulkarni K, Clark NG: Weight management through lifestyle modification for the prevention and management of type 2 diabetes: rationale and strategies: a statement of the American Di-

- abetes Association, the North American Association for the Study of Obesity, and the American Society for Clinical Nutrition. *Diabetes Care* 27:2067–2073, 2004
5. Norris SL, Engelgau MM, Venkat Narayan KM: Effectiveness of self-management training in type 2 diabetes: a systematic review of randomized controlled trials. *Diabetes Care* 24:561–587, 2001
  6. Snapinn SM: Noninferiority trials. *Curr Control Trials Cardiovasc Med* 1:19–21, 2000

## An Open, Randomized, Parallel-Group Study to Compare the Efficacy and Safety Profile of Inhaled Human Insulin (Exubera) With Glibenclamide as Adjunctive Therapy in Patients With Type 2 Diabetes Poorly Controlled on Metformin

Response to Kanna and Abreu-Pacheco

**W**e thank Kanna and Abreu-Pacheco (1) for their comments on our study (2). As Kanna and Abreu-Pacheco point out, overweight and obesity are strongly linked to the development of type 2 diabetes and can complicate its management. While most patients with type 2 diabetes are overweight (3), this study (2) included individuals with a range of BMI values typical of those seen in clinical practice; mean BMI in the inhaled insulin and glibenclamide groups was 31.8 (range 19–51) and 31.1 (22–47), respectively. When analyzed by baseline BMI values, the mean change from baseline A1C in the moderately high A1C arm ( $\geq 8$  to  $\leq 9.5\%$ ) was  $-1.6$ ,  $-1.3$ , and  $-1.5\%$  in patients with baseline BMI values of  $<30$ ,  $30$ – $35$ , and  $\geq 35$  kg/m<sup>2</sup>, respectively, compared with  $-1.5\%$  for all subjects. In the very high A1C arm ( $>9.5\%$ ), mean change from baseline A1C was  $-3.1$ ,  $-2.8$ , and  $-2.8\%$  in patients with baseline BMI values of  $<30$ ,  $30$ – $35$ , and  $\geq 35$  kg/m<sup>2</sup>, re-

spectively, compared with  $-2.9\%$  for all subjects. The results show no meaningful differences between the BMI categories, and the authors therefore believe it to be unlikely that the baseline BMI values could have confounded the A1C results.

For the duration of the study, patients were required to follow an American Diabetes Association diet (with 30% fat and calories sufficient to maintain ideal body weight) and to perform 30 min of moderate exercise at least 3 days per week. There was no specific measure of compliance with diet and exercise regimens during the study, but patients were reminded of their importance at each clinic visit.

Finally, we would like to point out that our study was open label and not blinded. As highlighted in the article, a double-blind study, while desirable, was not possible for two principal reasons: 1) it was not possible to manufacture a suitable placebo for inhaled insulin, and 2) it is generally inappropriate to blind treatment when individualized flexible dose titration is needed for effective management with exogenous insulin.

ANTHONY H. BARNETT, BSC, MD, FRCP<sup>1</sup>  
MANFRED DREYER, MD<sup>2</sup>  
PETER LANGE, MD<sup>3</sup>  
MARJANA SERDAREVIC-PEHAR,<sup>4</sup>  
ON BEHALF OF THE EXUBERA PHASE III  
STUDY GROUP

From the <sup>1</sup>University of Birmingham and Heart of England National Health Service Foundation Trust (Teaching), Birmingham, U.K.; the <sup>2</sup>Department of Diabetes and Metabolism, Bethanien Krankenhaus, Hamburg, Germany; the <sup>3</sup>Department of Respiratory Medicine, Hvidovre University Hospital, Hvidovre, Denmark; and <sup>4</sup>Pfizer Ltd., Sandwich, U.K.

Address correspondence to A.H. Barnett, Undergraduate Centre, Birmingham Heartlands Hospital, Bordesley Green East, Birmingham, B9 5SS, U.K. E-mail: anthony.barnett@heartofengland.nhs.uk.

M.S.-P. is an employee of Pfizer.

DOI: 10.2337/dc06-2173

© 2007 by the American Diabetes Association.

### References

1. Kanna B, Abreu-Pacheco H: An open, randomized, parallel-group study to compare the efficacy and safety profile of inhaled human insulin (Exubera) with glibenclamide as adjunctive therapy in patients with type 2 diabetes poorly controlled on metformin (Letter). *Diabetes Care* 30:445–446, 2007
2. Barnett AH, Dreyer M, Lange P, Serdarevic-Pehar M, the Exubera Phase III Study Group: An open, randomized, parallel-group study to compare the efficacy and safety profile of inhaled human insulin (Exubera) with glibenclamide as adjunctive

therapy in patients with type 2 diabetes poorly controlled on metformin. *Diabetes Care* 29:1818–1825, 2006

3. Daousi C, Casson IF, Gill GV, MacFarlane IA, Wilding JPH, Pinkney JH: Prevalence of obesity in type 2 diabetes in secondary care: association with cardiovascular risk factors. *Postgrad Med J* 82:280–284, 2006

## Hyperglycemia and Diabetes in Patients With Schizophrenia or Schizoaffective Disorders

Response to Cohen et al.

**W**e commend Cohen et al. (1) on their report on hyperglycemia and diabetes in patients with schizophrenia and schizoaffective disorders. To our knowledge, this is the first large study of oral glucose tolerance tests in this population.

Cohen et al. found that the prevalence rate of diabetes was significantly higher in patients with schizophrenia and schizoaffective disorders than in the general population. They did not detect a differential effect of antipsychotic monotherapy in diabetogenic effects, and they consequently proposed a modification of the consensus statement on antipsychotic drugs, obesity, and diabetes, i.e., measurement of fasting glucose in all patients with schizophrenia irrespective of the prescribed antipsychotic drug. We argue that the differences in the metabolic effects of different antipsychotic agents are too clear in the literature to justify any notion that the antipsychotic agents are comparable in their metabolic effects.

Comparative studies of antipsychotic agents are limited in their scope by the difficulty in conducting randomized controlled trials of antipsychotic agents. For many patients, specific antipsychotic agents are indicated ahead of the others based on the information available at that time. For example, clozapine is difficult to study in comparative investigations because it is not recommended by most as a first-line treatment. A recent study (2) addressed this issue to some extent by conducting a randomized controlled trial of risperidone and olanzapine in dogs. The dogs who received olanzapine developed hepatic insulin resistance, whereas those who received risperidone did not. Fur-



thermore, the usual compensatory increase in insulin secretion in response to insulin resistance was lacking in the olanzapine-fed dogs. Apart from the evidence of differential effects of the two agents, the results suggest that olanzapine may induce insulin resistance even in the absence of psychopathology. The lack of compensatory increase in insulin secretion suggests that olanzapine may also impair insulin secretion.

A recent correlational analysis (3) of receptor affinities of individual antipsychotic agents and their diabetogenic effects suggests that muscarinic M3 receptor affinity is the best predictor of risk for development of type 2 diabetes. The study was limited by its use of data from different laboratories, collected under different conditions. Nevertheless, the results are not surprising given the clinical knowledge that two of the antipsychotic agents with the most anticholinergic activity, clozapine and olanzapine, seem to present the greatest risk for development of type 2 diabetes. Among the first generation agents, there are reports (4) of diabetes in patients taking chlorpromazine, an agent with considerable anticholinergic activity. To our knowledge, however, there are no reports of diabetes in those taking haloperidol, an agent without significant anticholinergic activity. Muscarinic receptor affinity may also be the reason why a comparative study (5) of clozapine and chlorpromazine did not find a significant difference between treatments and their effects on weight or glucose metabolism. The study was cited by Cohen et al. (1) in support of their contention that all antipsychotic agents present risks of diabetes.

Taken together, these studies suggest that antipsychotic agents differ from one another in their effects on glucose metabolism. Until this issue is completely resolved, it would be prudent to monitor measurement of fasting glucose in all patients with schizophrenia, irrespective of the prescribed antipsychotic drug, with special attention provided to those taking olanzapine, clozapine, and chlorpromazine.

RIPU D. JINDAL, MD<sup>1,2</sup>  
MATCHERI S. KESHAVAN, MD<sup>1,2</sup>

From the <sup>1</sup>University of Pittsburgh, Pittsburgh, Pennsylvania; and <sup>2</sup>Wayne State University School of Medicine, Detroit, Michigan.

Address correspondence to Ripu D. Jindal, MD, University of Pittsburgh, 3811 O'Hara St., Pittsburgh, PA 15213. E-mail: jindalr@upmc.edu.

DOI: 10.2337/dc06-1313

© 2007 by the American Diabetes Association.

## References

1. Cohen D, Stolk RP, Grobbee DE, Gispen-de Wied CC: Hyperglycemia and diabetes in patients with schizophrenia or schizoaffective disorders. *Diabetes Care* 29:786–791, 2006
2. Ader M, Kim SP, Catalano KJ, Ionut V, Hucking K, Richey JM, Kabir M, Bergman RN: Metabolic dysregulation with atypical antipsychotics occurs in the absence of underlying disease: a placebo-controlled study of olanzapine and risperidone in dogs. *Diabetes* 54:862–871, 2005
3. Silvestre JS, Prous J: Research on adverse drug events. I. Muscarinic M3 receptor binding affinity could predict the risk of antipsychotics to induce type 2 diabetes. *Methods Find Exp Clin Pharmacol* 27:289–304, 2005
4. Schwarz L, Munoz R: Blood sugar levels in patients treated with chlorpromazine. *Am J Psychiatry* 125:253–255, 1968
5. Lieberman JA, Phillips M, Gu H, Stroup S, Zhang P, Kong L, Ji Z, Koch G, Hamer RM: Atypical and conventional antipsychotic drugs in treatment-naïve first-episode schizophrenia: a 52-week randomized trial of clozapine vs chlorpromazine. *Neuropsychopharmacology* 28:995–1003, 2003

## Hyperglycemia and Diabetes in Patients With Schizophrenia or Schizoaffective Disorders

Response to Jindal and Keshavan

We thank Jindal and Keshavan (1) for their contribution explaining the results of our study (2), which stated that in a cross-sectional design ( $n = 200$ ), no differences in the prevalence of diabetes or hyperglycemia between typical- or atypical-treated patients were found. We would like to make two comments on this statement. First, although the muscarinic M3 receptor affinity fits well with the diabetogenic properties of antipsychotic drugs, so does H<sub>1</sub>-histaminergic (but not muscarinic M3) receptor affinity with short-term weight gain, a factor that is often, but not always, present in antipsychotic-related diabetes (3,4). Second, it has been suggested (5) that risk factors of diabetes exert less pre-

dictive power in schizophrenia than in the general population. This hypothesis was tested (6) by examining the effect of the two major risk factors for diabetes: age and weight. In 200 patients with schizophrenia, typical (but not atypical) antipsychotic drugs modified the effect of these risk factors, confirming a less straightforward relationship between diabetes risk factors in schizophrenia than in the general population.

The statement by Jindal and Keshavan (1), that no cases of diabetes have been reported with haloperidol, may be interpreted as stressing the same point. Taken literally, it is simply untrue, as the following cases (7) have been reported: 10 of new-onset diabetes, 2 of worsening of existing diabetes, and 1 with an unknown preexisting status (on haloperidol monotherapy) with 4, 2, and 1 cases on haloperidol-risperidone combination therapy, respectively. More broadly speaking, Jindal and Keshavan (1) justly criticize the typical-atypical classification of antipsychotics as a scientifically unproductive dichotomy. This was shown (8) in cell culture, for instance, where haloperidol's inhibiting effect on cell proliferation was comparable with the atypical clozapine but not to the typicals chlorpromazine and fluphenazine. In this very complex matter, the ability to take any stance on explanatory pathways is currently precluded by the fact that research into the diabetogenic properties of antipsychotic medication and its pathways is just beginning.

DAN COHEN, MD, PHD<sup>1,2</sup>

From the <sup>1</sup>De Dijk, GGZ-NHN, Heerhugowaard, the Netherlands; and the <sup>2</sup>Department of Clinical Epidemiology, Rijks Universiteit Groningen, Groningen, the Netherlands.

Address correspondence to Dan Cohen, De Dijk, GGZ-NHN, Hectorlaan 19, 1702 CL Heerhugowaard, Netherlands. E-mail: d.cohen@ggz-nhn.nl.

DOI: 10.2337/dc06-2255

© 2007 by the American Diabetes Association.

## References

1. Jindal RD, Keshavan MS: Hyperglycemia and diabetes in patients with schizophrenia or schizoaffective disorders (Letter). *Diabetes Care* 30:446–447, 2007
2. Cohen D, Stolk RP, Grobbee DE, Gispen-de Wied CC: Hyperglycemia and diabetes in patients with schizophrenia or schizoaffective disorders. *Diabetes Care* 29:786–791, 2006
3. Wirshing DA, Wirshing WC, Kysar L, Berisford MA, Goldstein D, Pashdag J, Mintz J, Marder SR: Novel antipsychot-

- ics: comparison of weight gain liabilities. *J Clin Psychiatry* 60:358–363, 1999
4. Kroeze WK, Hufeisen SJ, Popadak BA, Renock SM, Steinberg S, Ernsberger P, Jayathilake K, Meltzer HY, Roth BL: HI-histamine receptor affinity predicts short-term weight gain for typical and atypical antipsychotic drugs. *Neuropsychopharmacology* 28:519–526, 2003
  5. Cohen D: Diabetes mellitus during olanzapine and quetiapine treatment in Japan (Letter). *J Clin Psychiatry* 66:265–266, 2005
  6. Cohen D: *Diabetes Mellitus in Schizophrenia or Schizoaffective Disorder: An Iatrogenic or Endogenous Problem?* Haarlem, Netherlands. PhD thesis. University of Utrecht, Netherlands, 2006
  7. Koller EA, Cross JT, Doraiswamy PM, Schneider BS: Risperidone-associated diabetes mellitus: a pharmacovigilance study. *Pharmacotherapy* 23:735–744, 2003
  8. Dwyer DS, Pinkofsky HB, Liu Y, Bradley RJ: Antipsychotic drugs affect glucose uptake and the expression of glucose transporters in PC12 cells. *Prog Neuro-Psychopharmacol Biol Psychiatry* 23:69–80, 1999

## Modeling Chronic Glycemic Exposure Variables as Correlates and Predictors of Microvascular Complications of Diabetes

Response to Dyck et al.

We read with interest the article by Dyck et al. (1), in which the authors described a chronic glycemic exposure variable ( $GE_i$ ) in the Rochester Study. They examined  $GE_i$  and its individual components (A1C, duration, and age at onset) in terms of prediction/correlation with complications and concluded that  $GE_i$  is generally predicted better than its individual components (see Table 3 of ref. 1).

Dyck et al. compared their results with our previously published analyses (2) using a different chronic glycemic exposure variable,  $A_1$  months, noting that (as also reported by the Diabetes Control and Complications Trial [3]) this combination variable did not predict better than its components ( $A_1$  and duration). Our

analytic approach, however, was different; we compared the fit of models, including the components to a model, with the composite alone. The differences in fit were small but favored the separate components. It would thus be interesting to compare the total  $R^2$  of alternate models, one with  $GE_i$  and another with its components, in the current study. We suspect that, as in our case, differences would be small.

Another interesting issue is the use of “age at onset” and “duration” (1) together effectively defining age itself. Could any enhanced prediction be related to age itself? Inclusion of the partial  $R^2$  for age in Table 3 (see ref. 1) would be useful.

Dyck et al. further suggested that differences between these studies may be explained by the “choice of patients” and differences in outcome assessment. As the Epidemiology of Diabetes Complications study (4) is comprised of community-treated type 1 diabetic individuals from a childhood-onset cohort shown to be epidemiologically representative of type 1 diabetes, selection bias was unlikely. However, the inclusion of type 2 diabetic subjects in the Rochester Study may have influenced results. Nevertheless, we agree that a continuous neuropathy outcome measure may be preferable and that this difference also may have contributed to the differences reported. Consequently, a comparison of  $A_1$  months and  $GE_i$  would be more informative if performed for the outcome common to both studies (Diabetes Control and Complications Trial protocol neuropathy).

Finally, one motivation behind developing the  $A_1$  month measure was to address whether a glycemic threshold exists above which complications develop. Were the authors able to examine this issue using  $GE_i$ ? While unable to determine a clear threshold, we found that  $\sim 1,000$   $A_1$  months were experienced before the advent of advanced complications. This translates to 42 years of A1C 2% above normal or 18 years at 5% above normal, which reflects another motivation for our chronic glycemic exposure variable—a clinically useful concept of risk.

TREVOR J. ORCHARD, MD  
TINA COSTACOU, PHD  
RACHEL G. MILLER, MS  
CATHERINE T. PRINCE, BA  
GEORGIA PAMBIANCO, MS, MPH

From the Department of Epidemiology, Graduate School of Public Health, University of Pittsburgh, Pittsburgh, Pennsylvania.

Address correspondence to Catherine Prince, Department of Epidemiology, Graduate School of Public Health, University of Pittsburgh, 3512 Fifth Ave., Pittsburgh, PA 15213. E-mail: princec@edc.pitt.edu.

DOI: 10.2337/dc06-2143

© 2007 by the American Diabetes Association.

## References

1. Dyck PJ, Davies JL, Clark VM, Litchy WJ, Dyck PJB, Klein CJ, Rizza RA, Pach JM, Klein R, Larson TS, Melton LJ III, O'Brien PC: Modeling chronic glycemic exposure variables as correlates and predictors of microvascular complications of diabetes. *Diabetes Care* 29:2282–2288, 2006
2. Orchard TJ, Forrest KY, Ellis D, Becker DJ: Cumulative glycemic exposure and microvascular complications in insulin-dependent diabetes mellitus: the glycemic threshold revisited. *Arch Intern Med* 157: 1851–1856, 1997
3. The Diabetes Control and Complications Trial Research Group: The relationship of glycemic exposure ( $HbA_{1c}$ ) to the risk of development and progression of retinopathy in the Diabetes Control and Complications Trial. *Diabetes* 44:968–983, 1995
4. Wagener DK, Sacks JM, LaPorte RE, MacGregor JM: The Pittsburgh Study of insulin-dependent diabetes mellitus: risk for diabetes among relatives of IDDM. *Diabetes* 31:136–144, 1982

## Modeling Chronic Glycemic Exposure Variables as Correlates and Predictors of Microvascular Complications of Diabetes

Response to Orchard et al.

We are pleased to respond to the letter by Orchard et al. (1), especially since they first raised the following question: Do composite measures of chronic glycemia correlate or predict complications better than individual components? Orchard et al. reported evidence against the hypothesis, while we (2) reported evidence for the hypothesis. Having considered their suggestions, we offer an explanation for why their conclusions differed from ours.

Orchard et al. (3) compared the fit

from two models, one consisting of only the composite and the other consisting of a regression model that included both components. The regression model is a linear combination of the two components in which the weights are chosen to obtain an optimal fit; thus, the regression model itself is a composite, though one in which the fit to the data should be better than  $A_1$  months (which is exactly what they found).

Since comparing two composites was not the goal of our study (2), we approached the analyses differently. We developed one regression model including all variables that were significant in the multivariate modeling, including the composite as well as individual components, as candidates for the model. Each partial  $R^2$  measures the explanatory value of the corresponding variable beyond the prediction already available from all the other variables in the model. Except for severity of retinopathy at baseline, we found that the composite was consistently the best predictor and that the individual components added little, if anything.

We agree that age at onset and duration added together equal the age of the patient at the time of study, although the appropriate weights for these two time periods in predicting the outcome may differ, and determining whether the weights significantly differ would be of interest. However, this was not a focus of our study.

We also agree that the patient population under study and the choice of outcomes to be analyzed can influence the results and that a continuous neuropathy measure is desirable. Although use of a common outcome measure would assist in comparing our results with those of Orchard et al. (3), such a comparison was not the focus of our study (2). Finally, determining the threshold of chronic glycemia, which induces complications, is a worthy goal, but before we do this we want to include studies of normal subjects and glucose-impaired individuals currently being studied.

PETER J. DYCK, MD<sup>1</sup>  
JENNY L. DAVIES, BA<sup>1</sup>  
VICKI M. CLARK, CCRP<sup>1</sup>  
WILLIAM J. LITCHY, MD<sup>1</sup>  
P. JAMES B. DYCK, MD<sup>1</sup>  
CHRISTOPHER J. KLEIN, MD<sup>1</sup>  
ROBERT A. RIZZA, MD<sup>2</sup>  
JOHN M. PACH, MD<sup>3</sup>  
RONALD KLEIN, MD<sup>4</sup>  
TIMOTHY S. LARSON, MD<sup>5</sup>

L. JOSEPH MELTON, III, MD<sup>6</sup>  
PETER C. O'BRIEN, PHD<sup>7</sup>

From the <sup>1</sup>Department of Neurology, Mayo Clinic College of Medicine, Rochester, Minnesota; the <sup>2</sup>Division of Endocrinology, Mayo Clinic College of Medicine, Rochester, Minnesota; the <sup>3</sup>Department of Ophthalmology, University of Wisconsin Madison, Madison, Wisconsin; the <sup>4</sup>Division of Nephrology and Hypertension, Mayo Clinic College of Medicine, Rochester, Minnesota; the <sup>5</sup>Division of Epidemiology, Mayo Clinic College of Medicine, Rochester, Minnesota; and the <sup>6</sup>Division of Biostatistics, Mayo Clinic College of Medicine, Rochester, Minnesota.

Address correspondence to Peter J. Dyck, MD, Mayo Clinic College of Medicine, Department of Neurology, 200 First St., SW, Rochester, MN 55905. E-mail: dyck.peter@mayo.edu.

DOI: 10.2337/dc06-2239

© 2007 by the American Diabetes Association.

## References

1. Orchard TJ, Costacou T, Miller RG, Prince CT, Pambianco G: Modeling chronic glycemic exposure variables as correlates and predictors of microvascular complications of diabetes (Letter). *Diabetes Care* 30:448, 2007
2. Dyck PJ, Davies JL, Clark VM, Litchy WJ, Dyck PJB, Klein CJ, Rizza RA, Pach JM, Klein R, Larson TS, Melton LJ III, O'Brien PC: Modeling chronic glycemic exposure variables as correlates and predictors of microvascular complications of diabetes. *Diabetes Care* 29:2282–2288, 2006
3. Orchard TJ, Forrest KY, Ellis D, Becker DJ: Cumulative glycemic exposure and microvascular complications in insulin-dependent diabetes mellitus: the glycemic threshold revisited. *Arch Intern Med* 157:1851–1856, 1997

## A Critical Appraisal of the Continuous Glucose-Error Grid Analysis

Response to Wentholt et al.

In a recent publication, Wentholt et al. (1) stated that their aim was to critically explore the continuous glucose-error grid analysis (CG-EGA) (2) and to compare it with traditional techniques using data previously reported from two sensors. As developers of the CG-EGA, we hoped that our method might stimulate a discussion on the important problem of the accuracy of continuous monitoring sensors (CGS); therefore, we read this critique with interest.

The methods used by Wentholt et al. (1) unfortunately failed to take into account the basic structure of CGS data, which represent time series (i.e., sequential readings that are ordered in time) (3). This structure leads to two fundamental requirements in their analysis. First, consecutive sensor readings taken from the same subject within a relatively short time are highly interdependent. Therefore, standard statistical analyses such as  $t$  tests, while appropriate for independent data points, will produce inaccurate results if applied to CGS data. Second, the order of the CGS data points is essential for clinical decision making. For example, the sequences 90 → 82 → 72 mg/dl and 72 → 82 → 90 mg/dl are clinically very different. Standard accuracy measures, such as the mean absolute deviation (MAD) used by Wentholt et al. (1), do not account for the data's temporal order; if reference-sensor data pairs are reshuffled, the MAD remains the same.

As a result, the primary statistical analysis used by Wentholt et al. is flawed, both to demonstrate significant differences between the sensors and to imply that CG-EGA is insensitive. The CGS data from 13 subjects were pooled to compare 2 MADs ( $15.0 \pm 12.2$  vs.  $13.6 \pm 10.2\%$ ). The result was reported as significant ( $P = 0.013$ ), but for these highly overlapping MADs to differ statistically required a large number ( $>1,000$ ) of degrees of freedom, which was calculated by pooling the total number of CGS data points (735 and 1,156) across all subjects. Such an approach led to inaccurate conclusions because there were only 13 independent subjects, and the data points within each subject were highly dependent. If the correct number of degrees of freedom is used, the MADs of the two sensors are not different ( $P > 0.5$ ), which confirms the CG-EGA results showing no differences.

Other conclusions by Wentholt et al. also deserve comment. First, they stated that CG-EGA is time consuming. Indeed, analyses of temporal data are intrinsically more sophisticated than standard time-independent statistics, but such analyses are essential for this type of data. CG-EGA software is available. Second, Wentholt et al. stated that "poor accuracy rate is barely noticeable in the final CG-EGA outcome," implying that this result of the CG-EGA is incorrect. However, this result is not incorrect because better combined (rate and point) accuracy during hypoglycemia is observed with the sensor, showing poorer rate accuracy in this critical region. It is



clinically apparent that when blood glucose is <3.9 mmol/l point accuracy should be given more emphasis than rate accuracy. A strength of CG-EGA is its ability to vary the input of either rate or point accuracy to overall clinical accuracy depending on blood glucose range. Third, the results of CG-EGA vary with time intervals. This is also an intuitive strength of CG-EGA, which is designed to account for increased noise associated with frequent sampling. We advocated (2) adopting a uniform sampling protocol with reference and/or sensor pairs taken every 10–15 min to standardize comparisons of rate accuracy, which is a sampling scheme based on physiological considerations of possible glucose change rates. Fourth, Wentholt et al. (1) questioned the appropriateness of the formulae to shift point EGA based on interstitial time lag. However, the authors reported an average time lag of ~7 min in one of their sensors, which is identical to that assumed for CG-EGA, thus confirming that ~7 min is a reasonable average for blood-to-interstitial diffusion delays. CG-EGA software allows setting this parameter to any value <7 min.

We are pleased that both the discussion regarding CG-EGA and the analysis of time series data have begun, and we look forward to continuing this important dialogue. However, we also recommend careful consideration of basic statistical assumptions when analyzing sensor-generated glucose data; their inherent temporal structure should be taken into account.

WILLIAM L. CLARKE, MD<sup>1</sup>

LINDA GONDER-FREDERICK, PHD<sup>2</sup>

DANIEL COX, PHD<sup>2</sup>

BORIS KOVATCHEV, PHD<sup>2</sup>

From the <sup>1</sup>Department of Pediatrics, University of Virginia Health System, Charlottesville, Virginia; and the <sup>2</sup>Department of Psychiatry and Neurobehavioral Sciences, University of Virginia Health System, Charlottesville, Virginia.

Address correspondence to Boris Kovatchev, Department of Psychiatry and Neurobehavioral Sciences, University of Virginia Health System, Box 800137, Charlottesville, VA 22908. E-mail: boris@virginia.edu.

DOI: 10.2337/dc06-1901

© 2007 by the American Diabetes Association.

## References

1. Wentholt IM, Hoekstra JB, DeVries JH: A critical appraisal of the continuous glucose–error grid analysis. *Diabetes Care* 29:1805–1811, 2006
2. Kovatchev BP, Gonder-Frederick LA, Cox

DJ, Clarke WL: Evaluating the accuracy of continuous glucose-monitoring sensors: continuous glucose–error grid analysis illustrated by Therasense Freestyle Navigator data. *Diabetes Care* 27:1922–1928, 2004

3. Chatfield C: *The Analysis of Time Series: An Introduction*. 6th ed. Boca Raton, FL, Chapman and Hall/CRC, 2004, p. 1

## A Critical Appraisal of the Continuous Glucose–Error Grid Analysis

Response to Clarke et al.

**W**e thank Clarke et al. (1) for their thought-provoking response to our article (2). With their comments (1), they not only took on the important issue of how to optimally assess the accuracy of continuous glucose monitors (CGMs); they moved the discussion one step further.

In our study (2), we did indeed take the statistical liberty of deriving degrees of freedom from all pooled data points—in contrast to the proposal by Clarke et al. (1) who compared the accuracy of two sensors using one average mean absolute deviation (MAD) value per patient. The latter approach may be too rigid because not all readings are interdependent. For example, postprandial glucose sensor readings at lunch and at night depend little on each other, if at all. It is common practice to derive degrees of freedom from pooled data in the sensor field. In a previous study, Clarke et al. (3) compared the accuracy of two CGMs in 16 type 1 diabetic patients by using the continuous glucose–error grid analysis (CG-EGA). The difference in pooled readings in the hypoglycemic area that ended up in zones A and B was reported to be highly significant between both sensors (88 vs. 62.8%, respectively) ( $P < 0.0005$ ). This level of significance implies that degrees of freedom were derived from all data pairs in the hypoglycemic range (250 mg/dl) rather than from the actual amount of participants ( $n = 16$ ). Even with a strict statistical policy, the better MAD for the microdialysis sensor in the hypoglycemic area in our study (2) (12.0% for the 7-min corrected microdialysis sensor vs. 25.2% for the needle-type sensor, calculated per patient [ $df = 12$ ],  $P = 0.036$  by Wilcox-

on's signed-rank test) and the larger sensitivity for hypoglycemia associated with this sensor (75.0 [75 data pairs] vs. 55.9% [56 data pairs],  $P = 0.018$  by Pearson's  $\chi^2$ , with 16 of 16 and 12 of 15 hypoglycemic episodes detected by the microdialysis and needle-type sensor, respectively,  $P = 0.06$  by Pearson's  $\chi^2$ ) contrasted with the CG-EGA that noted no difference (51.5 vs. 60.0% accurate readings and benign errors in the hypoglycemic range [ $df = 42$ ],  $P = 0.841$  by Pearson's  $\chi^2$  for the microdialysis and the needle-type sensor, respectively). Therefore, even with a mild statistical approach (i.e., deriving degrees of freedom from 43 data pairs rather than 13), CG-EGA could not confirm the different accuracy of the sensors in the hypoglycemic range.

As to the order of CGS data points, the sensor's ability to follow the rate and direction of glucose changes is nicely reflected by the MAD: A sequence of glucose values that has been incorrectly reported by a given sensor (e.g., 90 → 82 → 72 mg/dl instead of 72 → 82 → 90 mg/dl) will result in a worsened MAD.

In reaction to the comment by Clark et al. (1) in regards to time consumption, we were happy to learn that the software for CG-EGA has become available. Nevertheless, the laborious collection of frequent blood samples on fixed intervals (in addition to the construction of a rate, a point accuracy plot, and, finally, a combining matrix) will remain inevitable drawbacks of CG-EGA.

With the attempt to standardize the length of the time intervals, Clark et al. clearly tried to improve the CG-EGA methodology. Nevertheless, a time interval that can vary by 5 min (10–15 min) still leaves the door open for interobserver variability.

As to our finding in a previous study (4) of a 7-min delay that was inherent to the microdialysis instrument itself and not seen in the needle-type sensor, Clarke et al. (1) alluded to a (much-disputed) constant 7-min physiological delay resulting from the relationship between interstitial and blood glucose. This physiological delay has been reported to be anywhere between 0 and 30 min, so the 7-min assumption made for the CG-EGA is questionable. Fortunately, Clarke et al. have now implemented into the software the possibility of setting the delay <7 min.

Currently, the optimal way to assess a CGM seems to be the combination of MAD calculated per glucose range, com-

bined curve fitting with assessment of horizontal and vertical shift, sensitivity, and positive predictive value for detecting hypoglycemia.

IRIS M. WENTHOLT, MD  
JOOST B. HOEKSTRA, MD, PHD  
J. HANS DeVRIES, MD, PHD

From the Department of Internal Medicine, Academic Medical Center, Amsterdam, the Netherlands.

Address correspondence to Iris M. Wentholt, MD, Department of Internal Medicine, Academic Medical Center, P.O. Box 22660, Amsterdam 1105 AZ, Netherlands. E-mail: i.m.wentholt@amc.uva.nl.

DOI: 10.2337/db06-2157

© 2007 by the American Diabetes Association.

## References

1. Clarke WL, Gonder-Frederick LG, Cox D, Kovatchev B: A critical appraisal of the continuous glucose-error grid analysis (Letter). *Diabetes Care* 30:449–450, 2007
2. Wentholt IM, Hoekstra JB, DeVries JH: A critical appraisal of the continuous glucose-error grid analysis. *Diabetes Care* 29:1805–1811, 2006
3. Clarke WL, Anderson S, Farhy L, Breton M, Gonder-Frederick L, Cox D, Kovatchev B: Evaluating the clinical accuracy of two continuous glucose sensors using continuous glucose-error grid analysis. *Diabetes Care* 28:2412–2417, 2005
4. Wentholt IM, Vollebregt MA, Hart AA, Hoekstra JB, DeVries JH: Comparison of a needle-type and a microdialysis continuous glucose monitor in type 1 diabetic patients. *Diabetes Care* 28:2871–2876, 2005

## Breast-Feeding and Risk for Childhood Obesity

Response to Mayer-Davis et al.

The study by Mayer-Davis et al. (1) reflects the fact that maternal nutrition plays an important role in the pathogenesis of childhood obesity. Breast milk contains linoleic acid (of the n-6 polyunsaturated fatty acids [PUFA] series) and  $\alpha$  linolenic acid (of the n-3 PUFA series) as well as longer chain derivatives, such as arachidonic acid (of the n-6 PUFA series) and docosahexanoic acid (of the n-3 PUFA series). Maternal intake determines content of breast milk, which ultimately affects the infant's future health.

Childhood obesity is probably an immune inflammatory response to a faulty diet of the mother (before and during gestation and lactation) consisting of high n-6 PUFAs, low n-3 PUFAs, and deranged n-6-to-n-3 ratio (2). In those who are breast-fed, breast milk provides longer-chain n-3 PUFAs, which prevent ectopic accumulation of fatty acids in muscle and liver (3,4). Formula feeding does not provide this benefit. Cow's milk content depends on whether it is pasture fed (more n-3 PUFAs) or given commercial feeds (more n-6 PUFAs). Breast-fed infants have a muscle membrane fatty acid composition similar to insulin-sensitive adults, and formula-fed infants have a muscle membrane fatty acid composition similar to insulin-resistant adults (5). Correcting n-6 and n-3 PUFAs in the diet is currently needed for changing global health for one and all.

MANISHA TALIM, MBBS, DD

From Shushrusha Hospital, Mumbai, India.

Address correspondence to Dr. Manisha Talim, Shushrusha Hospital, 698-B Ranade Rd., Dadar, Mumbai 400028, India. E-mail: drmanishatalim@yahoo.com.

DOI: 10.2337/dc06-2243

© 2007 by the American Diabetes Association.

## References

1. Mayer-Davis EJ, Rifas-Shiman SL, Zhou L, Hu FB, Colditz GA, Gillman MW: Breast-feeding and risk for childhood obesity. *Diabetes Care* 29:2231–2237, 2006
2. Raheja BS, Talim M: Dietary fats and their lipid toxicity: role in pathogenesis of CHD, diabetes and cancer. *Jour Diab Assoc India* 38:1–11, 1998
3. Todoric J, Loffler M, Huber J, Bilban M, Reimers M, Kadl A, Zeyda M, Waldhausl W, Stulnig TM: Adipose tissue inflammation induced by high-fat diet in obese diabetic mice is prevented by n-3 polyunsaturated fatty acids. *Diabetologia* 49: 2109–2119, 2006
4. Carpentier YA, Portois L, Malaisse WJ: N-3 fatty acids and the metabolic syndrome. *Am J Clin Nutr* 83 (Suppl. 6): 1499s–1504s, 2006
5. Baur LA, O'Connor J, Pan DA, Kriketos AD, Storlein LH: The fatty acid composition of skeletal muscle membrane phospholipid: its relation with the type of feeding and plasma glucose levels in young children. *Metabolism* 47:106–112, 1998

## Breast-Feeding and Risk for Childhood Obesity

Response to Mayer-Davis et al.

We read with great interest the recent study by Mayer-Davis et al. (1) on the impact of breast-feeding on childhood obesity risk in the presence of maternal diabetes or obesity. The authors drew conclusions that seem to directly oppose previous observations from our group (2,3). However, we would like to deliver three arguments suggesting that the presented data can also be interpreted in a completely different manner and in no way exclude, but rather support, a potentially negative dose-depending effect of early neonatal breast-feeding on overweight risk in offspring of diabetic/overweight mothers, as observed by us.

First, the majority of fully adjusted estimates for the effect of maternal diabetes have 95% CIs that include decreased as well as increased odds ratios over a wide range (e.g., odds ratio 0.79 [0.29–2.16] for breast milk only vs. formula only). By statistical definition, one therefore cannot exclude the possibility that the true effect of breast-feeding on overweight risk in the presence of maternal diabetes/obesity is not beneficial but deleterious, at least in a considerable number of cases.

Second, breast-feeding during the 1st month by diabetic mothers increased overweight risk compared with formula feeding. This, in fact, confirms rather than rejects our observations. Moreover, this is unlikely to be accounted for by reverse causation, since no dose response-like relation between duration of breast-feeding and risk of overweight was observed in offspring of diabetic mothers. These data may even support our hypothesis of a crucial and probably even deleterious impact of breast-feeding by diabetic mothers during the early neonatal period.

Finally, the authors stated that our observations might reflect “appropriate” growth rather than untoward effects. This, however, does not correspond with increased prevalence of overweight in the highest tertile of early neonatal intake of diabetic breast milk, using the symmetry index (2) additionally validated against BMI (4). Most importantly, this interpretation completely ignores deleterious ef-



fects on glucose tolerance resulting from increased relative weight, as also observed in our study (2).

We strictly support the statement of Mayer-Davis et al. (1) that breast-feeding should be recommended for all women. However, against the background of the rather exemplary arguments provided here, this story is far from being finished. Much more research is urgently needed, especially to ensure safety of our general recommendation also in the case of early neonatal breast-feeding by diabetic/overweight mothers.

ANDREAS PLAGEMANN, MD  
THOMAS HARDER, MD, MSCE  
ELKE RODEKAMP, MD  
JOACHIM W. DUDENHAUSEN, MD

From the Experimental Obstetrics Research Group, Clinic of Obstetrics, Charité – University Medicine Berlin, Campus Virchow-Klinikum, Berlin, Germany.

Address correspondence to Prof. Andreas Plagemann, MD, Head of Experimental Obstetrics, Charité – University Medicine Berlin, Campus Virchow-Klinikum, Augustenburger Platz 1, 13353 Berlin, Germany. E-mail: andreas.plagemann@charite.de.

DOI: 10.2337/dc06-2180

© 2007 by the American Diabetes Association.

## References

1. Mayer-Davis EJ, Rifas-Shiman SL, Zhou L, Hu FB, Colditz GA, Gillman MW: Breast-feeding and risk for childhood obesity. *Diabetes Care* 29:2231–2237, 2006
2. Plagemann A, Harder T, Franke K, Kohlhoff R: Long-term impact of neonatal breast-feeding on body weight and glucose tolerance in children of diabetic mothers. *Diabetes Care* 25:16–22, 2002
3. Rodekamp E, Harder T, Kohlhoff R, Franke K, Dudenhausen JW, Plagemann A: Long-term impact of breast-feeding on body weight and glucose tolerance in children of diabetic mothers: role of the late neonatal period and early infancy. *Diabetes Care* 28:1457–1462, 2005
4. Plagemann A, Harder T, Kohlhoff R, Rohde W, Dörner G: Overweight and obesity in infants of mothers with long-term insulin-dependent diabetes or gestational diabetes. *Int J Obes Relat Metab Disord* 21:451–456, 1997

## Breast-Feeding and Risk for Childhood Obesity

Response to Plagemann et al.

We appreciate the interest and comments of Plagemann et al. (1) regarding our study (2) on maternal status as a potential modifier of association of breast-feeding on childhood obesity. As noted, for the contrast of breast milk only versus formula only, the 95% CI excluded the null value, thus necessarily including values  $>1.0$ . From a statistical perspective, however, the best estimate for this contrast is an odds ratio (OR) of 0.79, not a value  $>1.0$ . Furthermore, the test for dose response suggested a statistically significant trend in the direction of protection by breast-feeding for both groups. Finally, there is no indication of a differential effect of breast-feeding according to maternal status. Specifically, for both exclusivity and duration of breast-feeding, the interaction term from fully adjusted models was  $P = 0.50$  and  $P = 0.66$ , respectively. Thus, our interpretation of the data is that there is no evidence of a deleterious effect of breast-feeding according to maternal obesity or diabetes status.

With regard to the second point raised by Plagemann et al. (1), the OR of 1.11 for overweight among children of diabetic mothers who were breast-fed  $<1$  month compared with those who were formula fed was in the same direction (i.e., potentially deleterious) as observed in the previous work by Plagemann et al. (3). We note that for this specific contrast, the 95% CI was quite wide (0.22–5.60), making interpretation difficult. Interestingly, the OR for the same contrast for nondiabetic mothers with BMI  $>25$  kg/m<sup>2</sup> was also  $>1.0$  (OR 1.46 [95% CI 1.01–2.13]). We noted in our original article (2) that to interpret this finding, one must consider potential circumstances related to the decision to stop breast-feeding at such a young age, as well as the infant-feeding behaviors in response to those circumstances. Here, while we agree with Plagemann et al. (1) that there

is a need for further work in this regard, we note that the context of breast-feeding duration during the neonatal period (i.e., choosing to stop or to continue breast-feeding) is extremely important to consider, rather than simply focusing on this time period in isolation.

Finally, our work was, in fact, very specifically motivated by that of Plagemann et al., and thus we certainly agree that this topic is of considerable importance. Our comments in our study (2) regarding potential explanations for differences in our findings were speculative; thus, we have no further comments in this regard.

ELIZABETH J. MAYER-DAVIS, PHD<sup>1</sup>  
SHERYL L. RIFAS-SHIMAN, MPH<sup>2</sup>  
LI ZHOU, BS<sup>1</sup>  
FRANK B. HU, MD, PHD<sup>3,4,5</sup>  
GRAHAM A. COLDITZ, MD, PHD<sup>3,4</sup>  
MATTHEW W. GILLMAN, MD, SM<sup>2,4,5</sup>

From the <sup>1</sup>Center for Research in Nutrition and Health Disparities, Department of Epidemiology and Biostatistics, Arnold School of Public Health, University of South Carolina, Columbia, South Carolina; the <sup>2</sup>Department of Ambulatory Care and Prevention, Harvard Medical School and Harvard Pilgrim Health Care, Boston, Massachusetts; the <sup>3</sup>Channing Laboratory, Brigham and Women's Hospital, Boston, Massachusetts; the <sup>4</sup>Department of Nutrition, Harvard School of Public Health, Boston, Massachusetts; and the <sup>5</sup>Department of Epidemiology, Harvard School of Public Health, Boston, Massachusetts.

Address correspondence to Elizabeth J. Mayer-Davis, PhD, Center for Research in Nutrition and Health Disparities, University of South Carolina, Arnold School of Public Health, 2718 Middleburg Dr., Columbia, SC 29208. E-mail: ejmayer@gwm.sc.edu.

DOI: 10.2337/dc06-2336

© 2007 by the American Diabetes Association.

## References

1. Plagemann A, Harder T, Rodekamp E, Dudenhausen JW: Breast-feeding and risk for childhood obesity (Letter). *Diabetes Care* 30:451–452, 2007
2. Mayer-Davis EJ, Rifas-Shiman SL, Zhou L, Hu FB, Colditz GA, Gillman MW: Breast-feeding and risk for childhood obesity. *Diabetes Care* 29:2231–2237, 2006
3. Plagemann A, Harder T, Franke K, Kohlhoff R: Long-term impact of neonatal breast-feeding on body weight and glucose tolerance in children of diabetic mothers. *Diabetes Care* 25:16–22, 2002
